# Supplementary material for: Candida albicans Modulates Murine and Human Beta Defensin-1 during Vaginitis
Source: MDPI journal article supplement (doi:10.3390/jof8010020), 2021-12-28
Supplement: s1 [file s1]

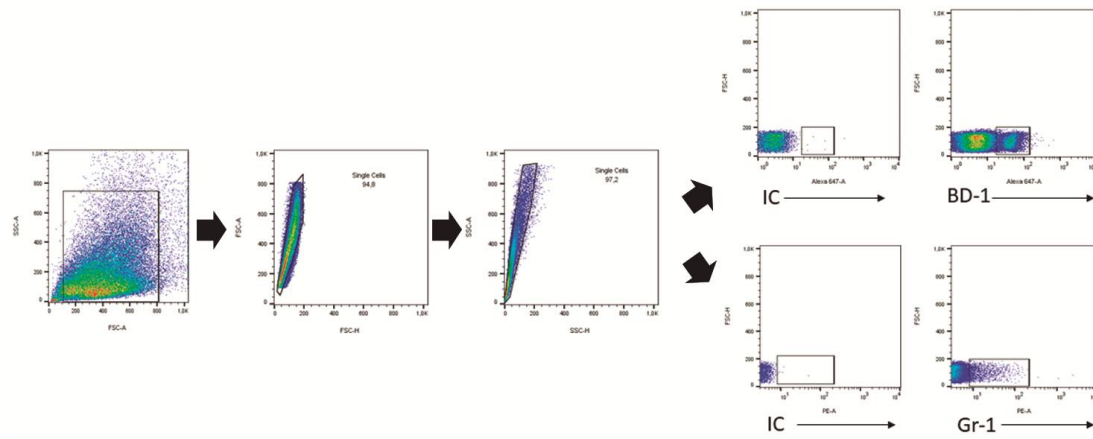

Figure S1. Dot plot shows the gate strategy as follow: to exclude dead cell and aggregates from analysis, cells were first gated on excluding the smallest cells and debris region and then by gating on singlets regions based on FSC-A vs. FSC-H and SSC-A vs. SSC-H. Then Gr-1 + cells and BD-1+ cells were determined.
